# Supplementary material for: Robust small molecule-aided cardiac reprogramming systems selective to cardiac fibroblasts
Source: PubMed Central journal article supplement — iScience. 2023 Nov 14;26(12):108466. doi: 10.1016/j.isci.2023.108466 (PMC10709133; doi:10.1016/j.isci.2023.108466), 2023-11-14
Supplement: mmc1.pdf [file mmc1.pdf]

iScience, Volume 26

**Supplemental information**

**Robust small molecule-aided  
cardiac reprogramming systems  
selective to cardiac fibroblasts**

**Yanmeng Tao, Yang Yang, Zhenghao Yang, Lipeng Wang, Shi-Qiang Wang, and Yang Zhao**

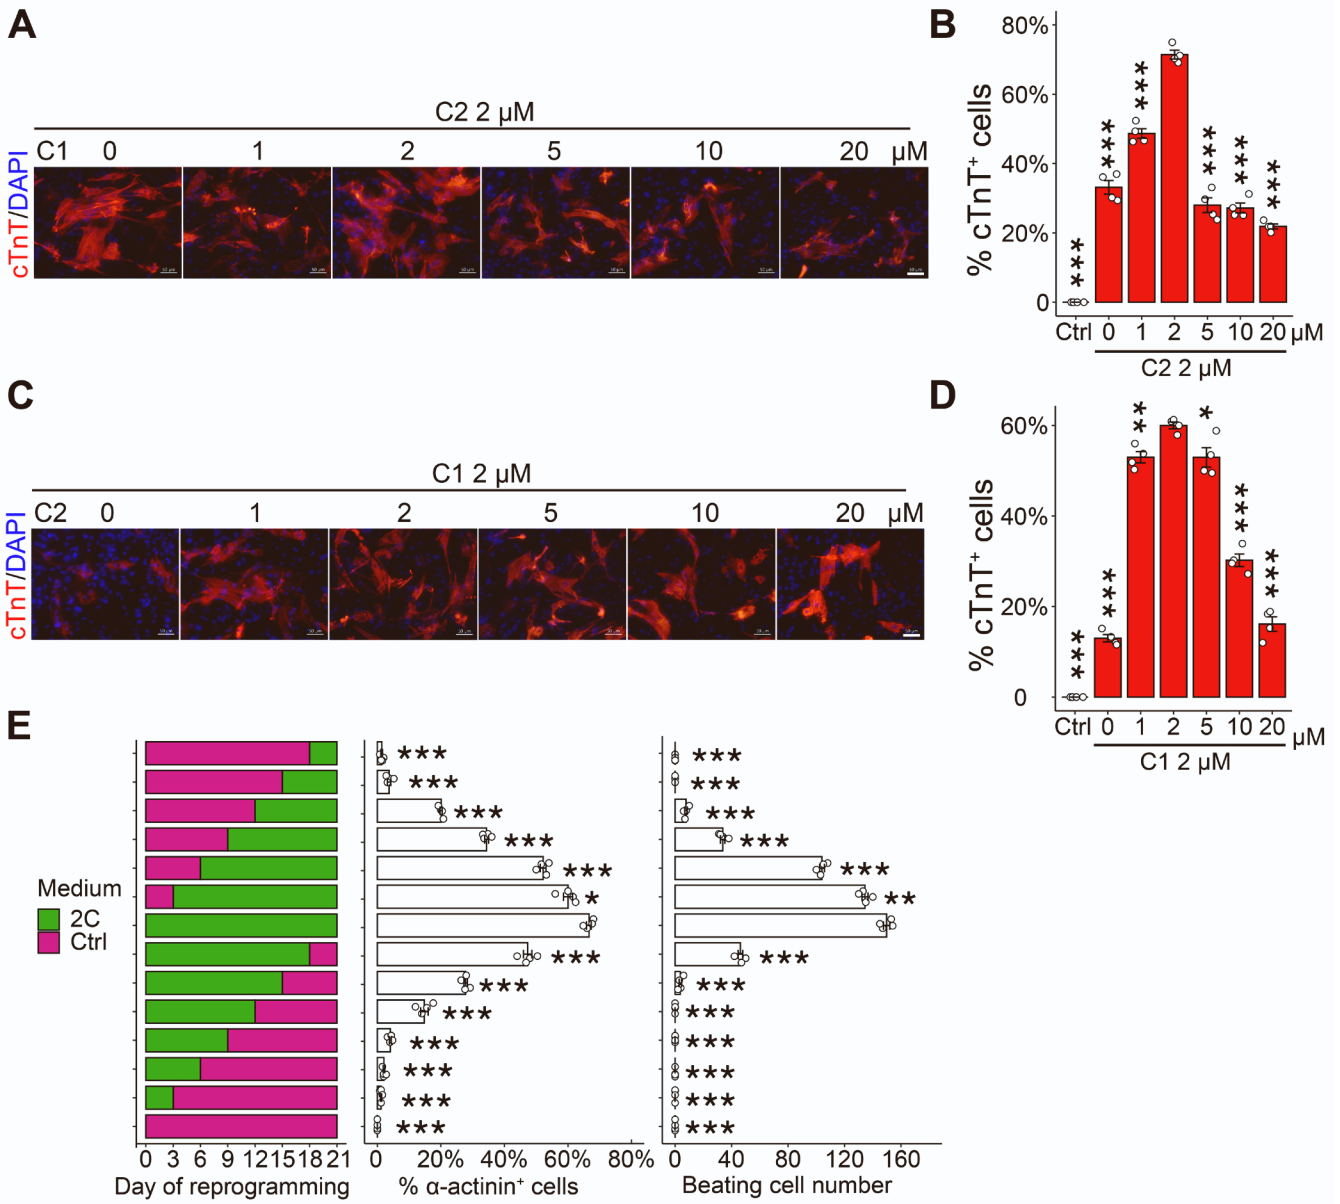

**Figure S1. Dosage and timing optimization for 2C, related to Figure 1**

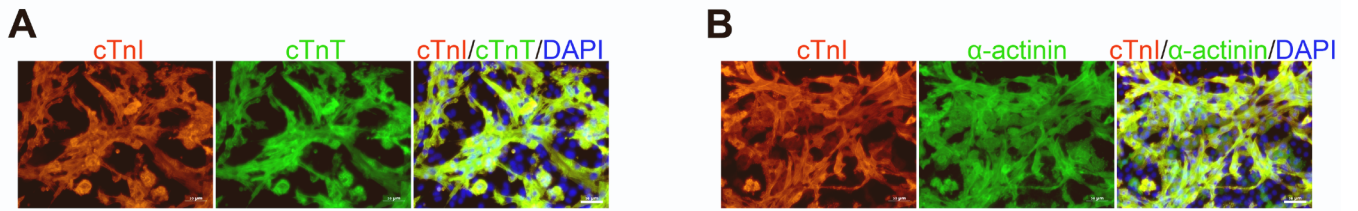

**Figure S2. MT+2C induced iCMs co-express multiple cardiomyocyte-specific markers, related to Figure 1**

**A**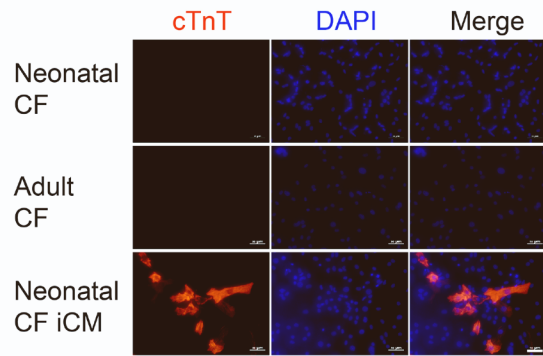**B**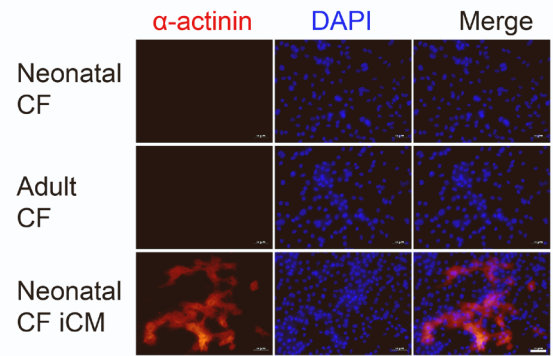

**Figure S3 Confirmation of mouse cardiac fibroblasts, related to Figure 2**

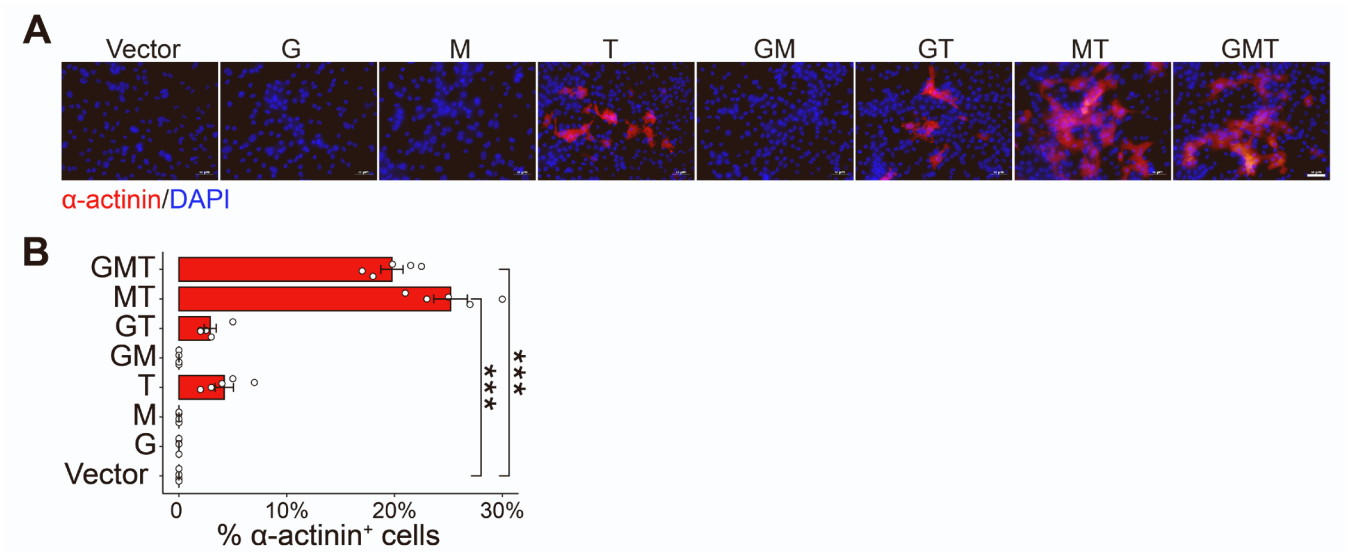

**Figure S4. Different combinations of transcription factors reveal MT enables cardiac reprogramming in presence of 2C, related to Figure 2**

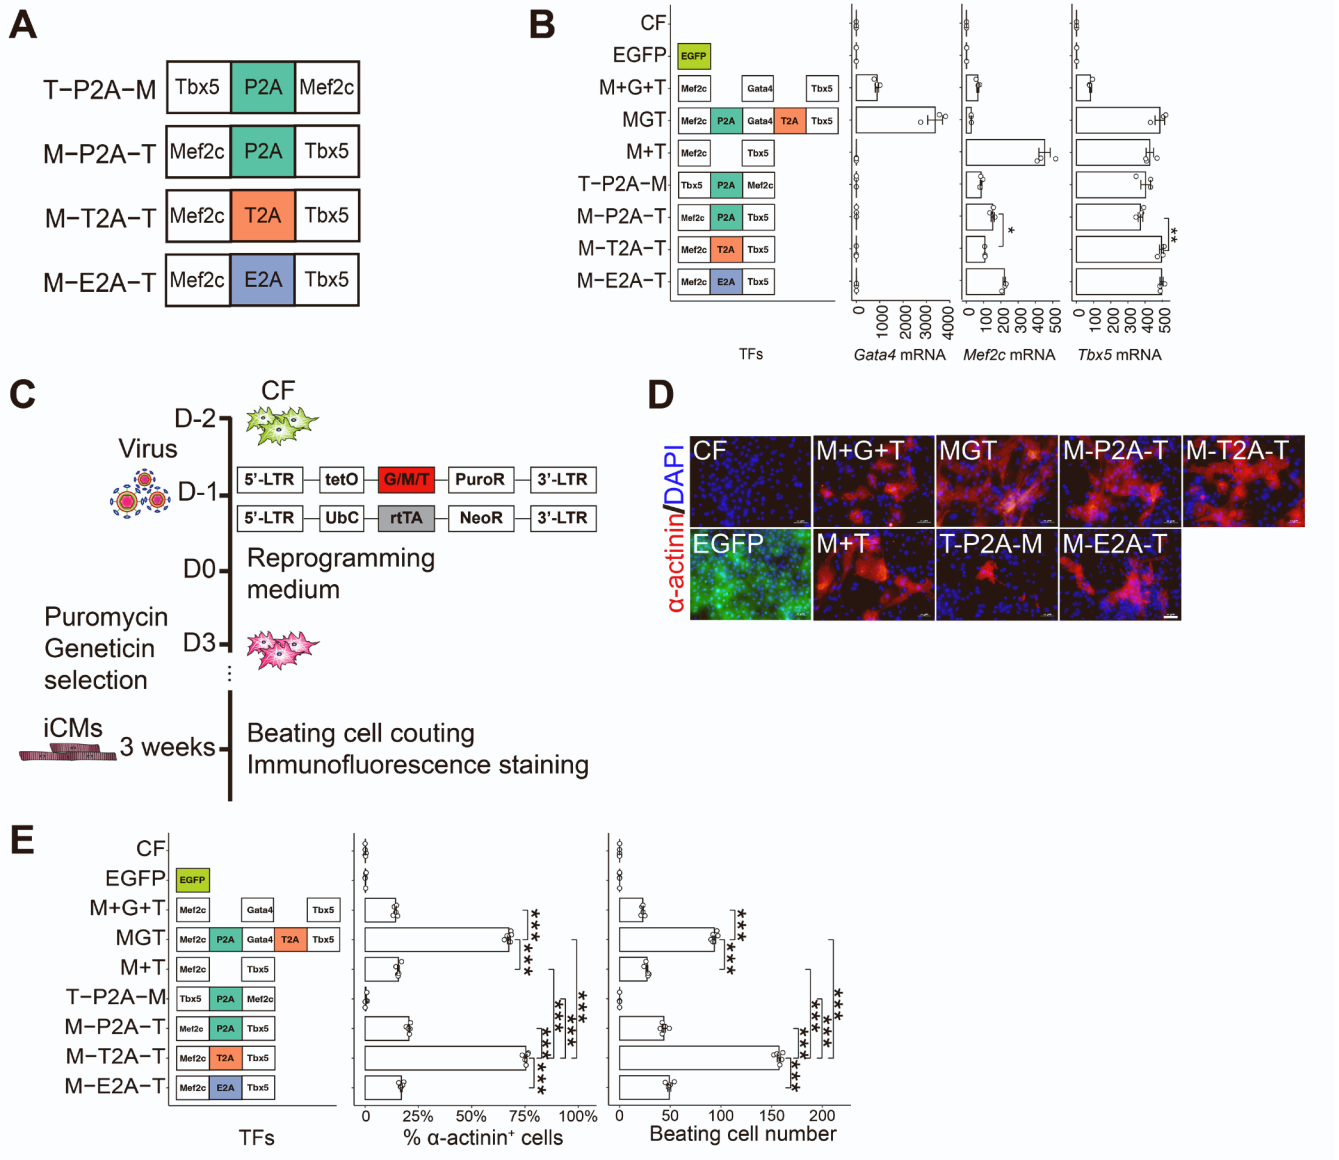

**Figure S5 Optimized stoichiometry of Mef2c and Tbx5 results in higher efficiency, related to Figure 2**

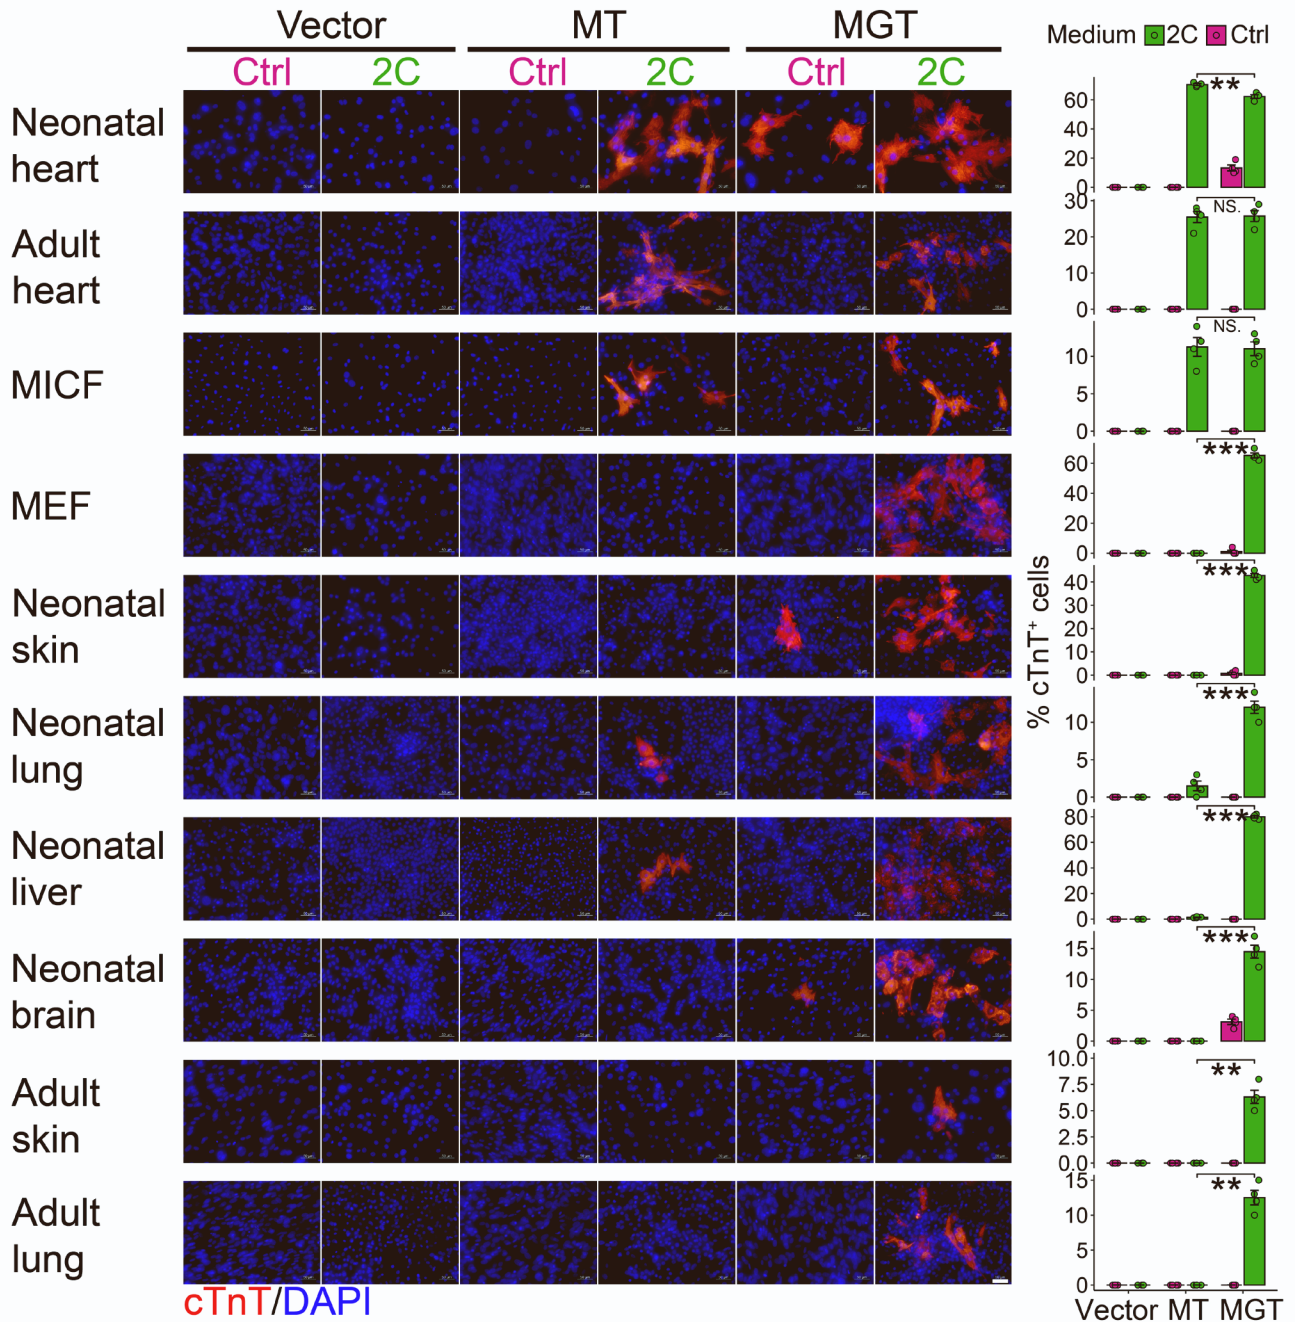

Figure S6 MT+2C selectively reprogram fibroblasts derived heart into iCMs, related to Figure 2

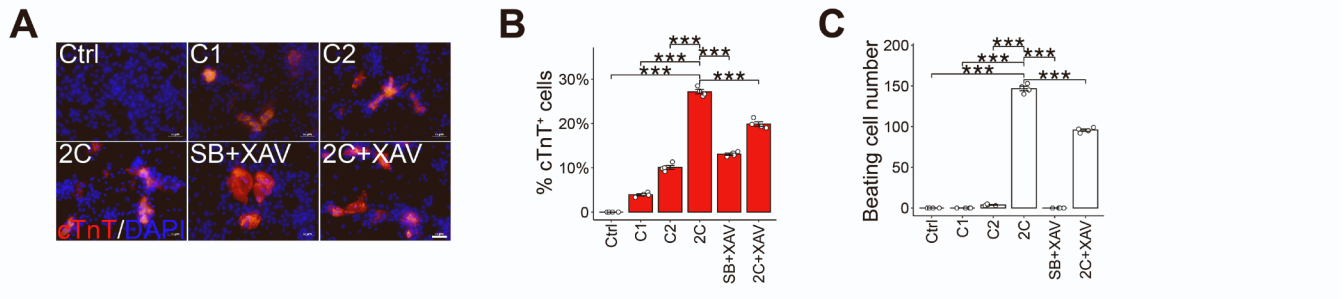

**Figure S7. Both C1 and C2 are essential for substituting Gata4, related to Figure 2**



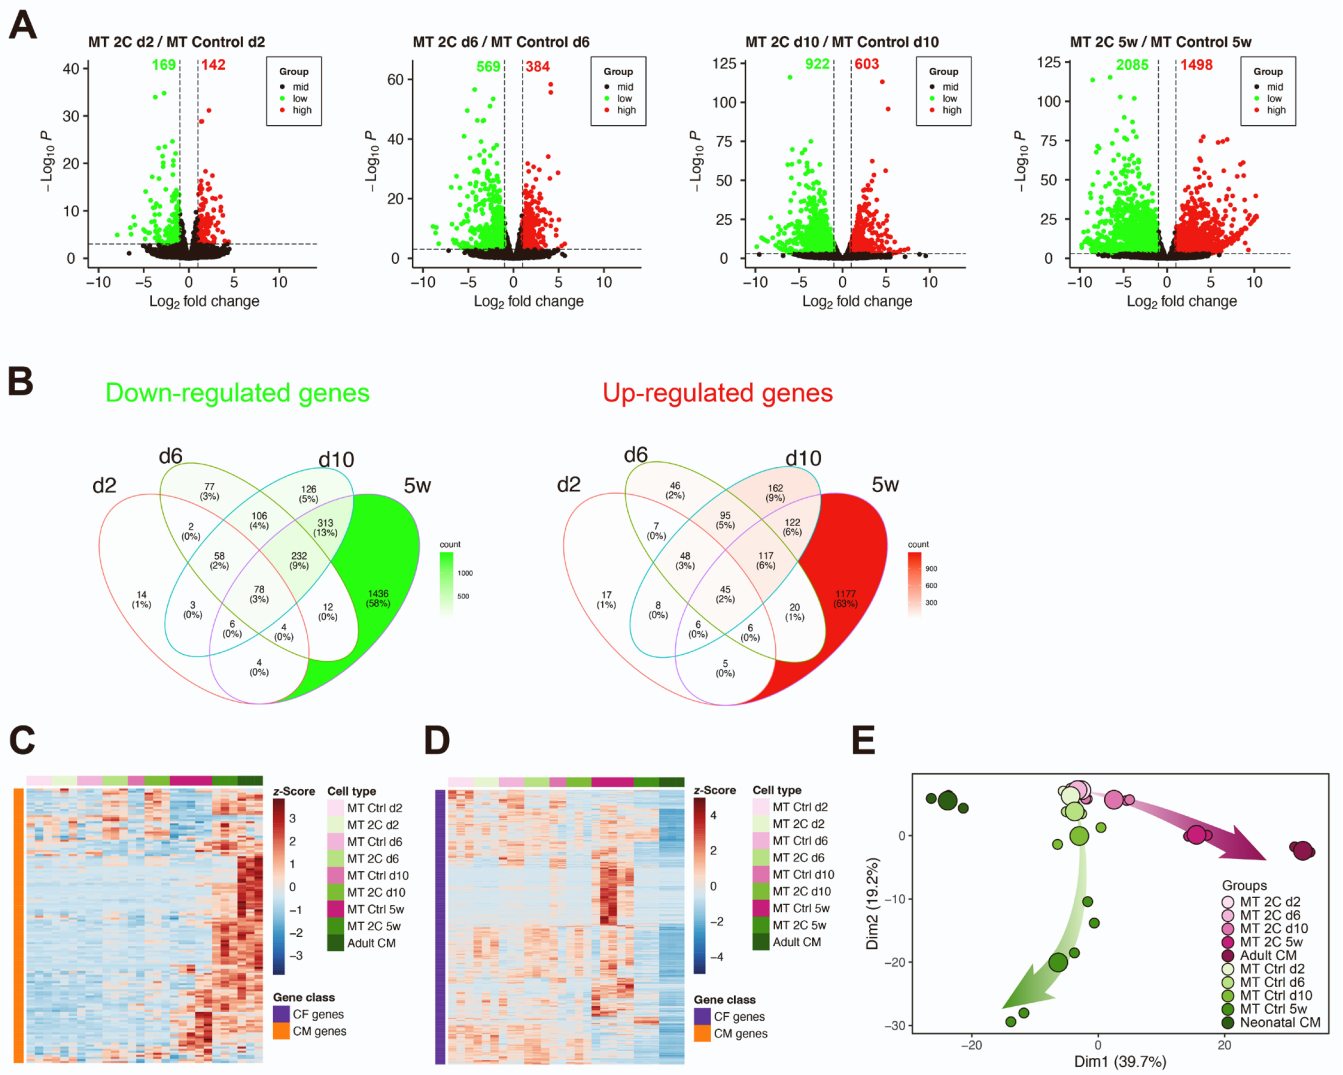

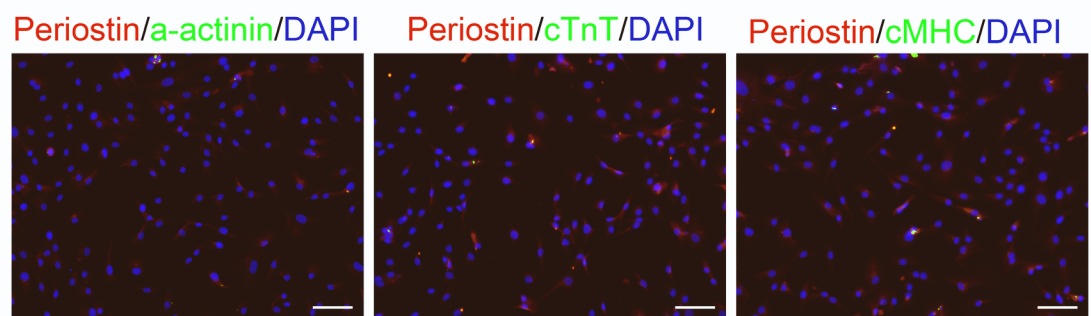

**Figure S9. Confirmation of human cardiac fibroblasts, related to Figure 4**

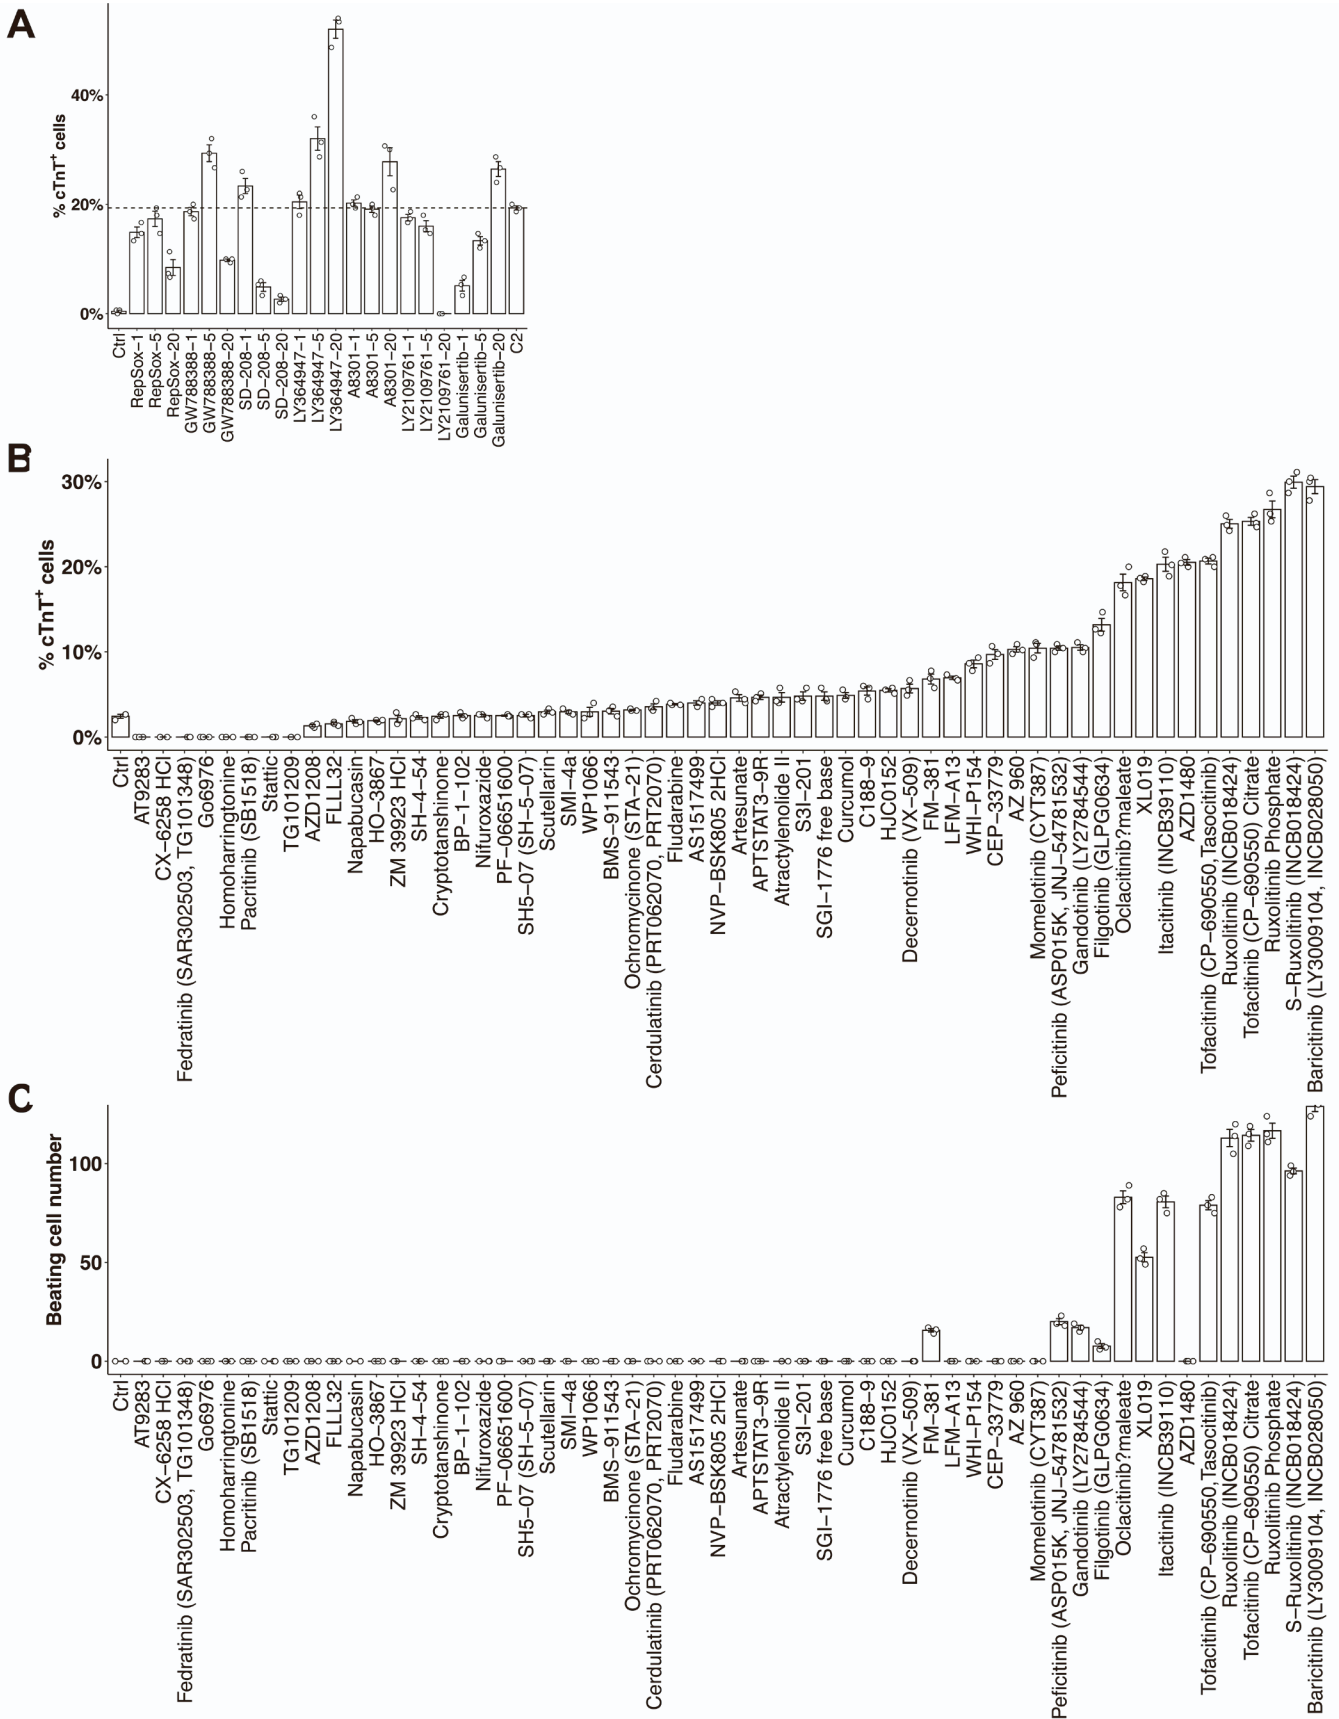

**Figure S10. All TGF beta inhibitors tested works as C1, whereas only a few pan-Jak inhibitors works as C2, related to Figure 7**

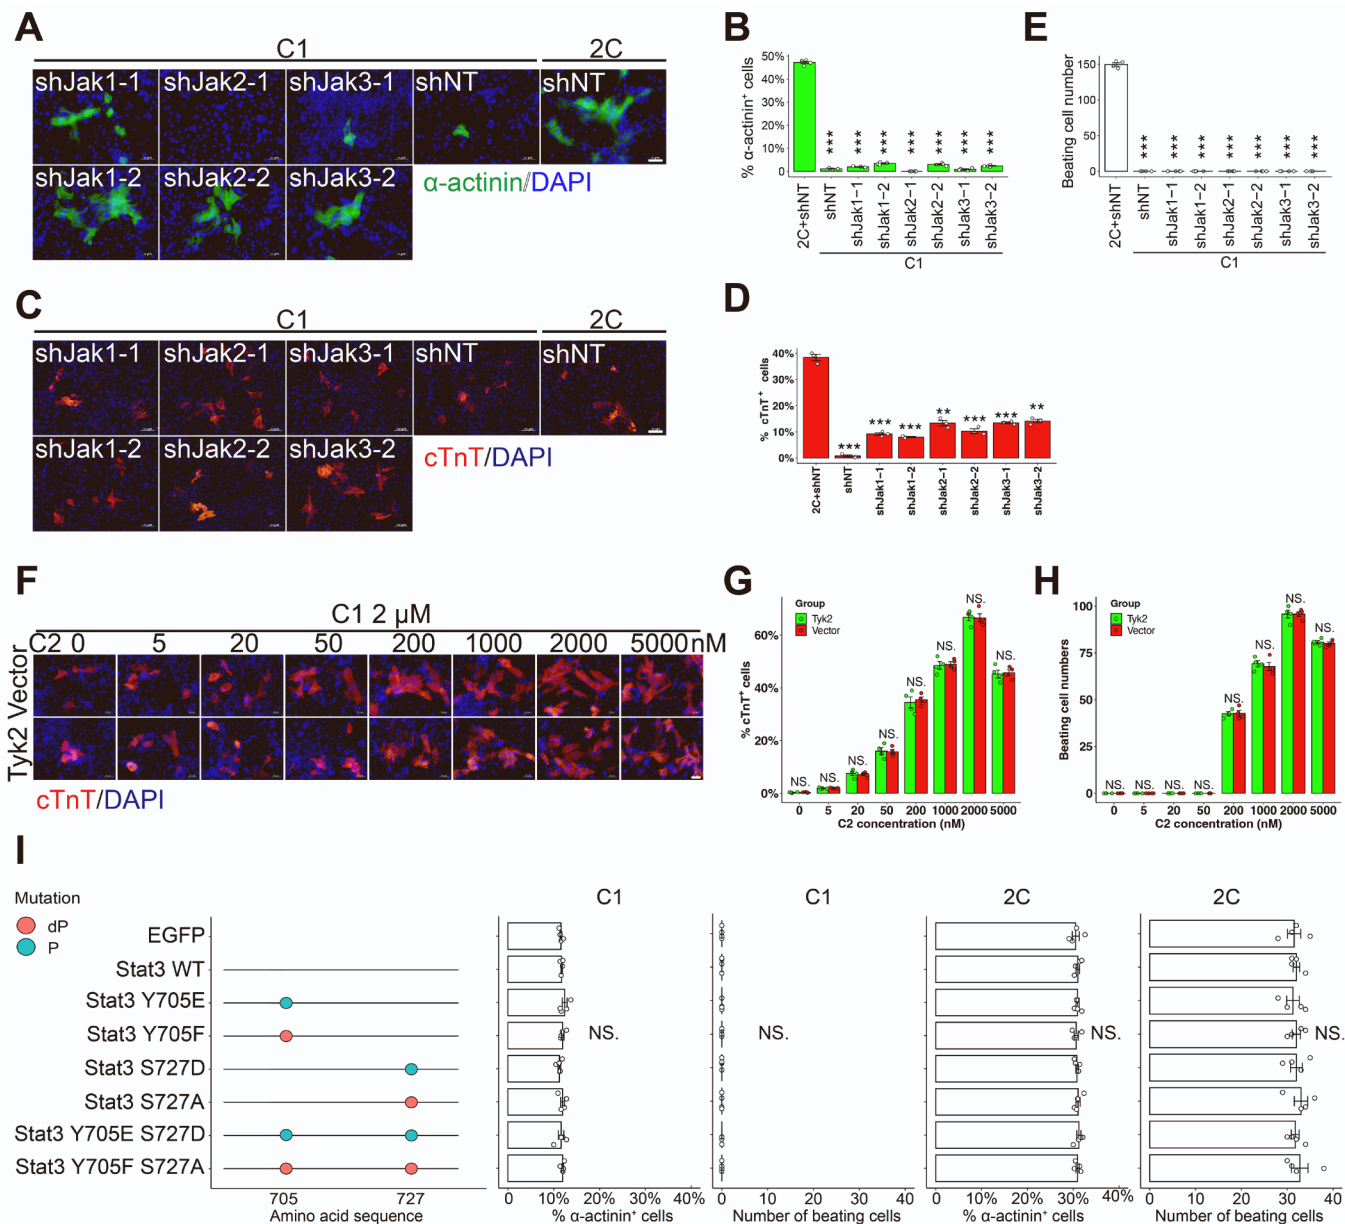

**Figure S11. C2 enhances cardiac reprogramming independent of inhibiting the canonical Jak-Stat signal pathway, related to Figure 7**

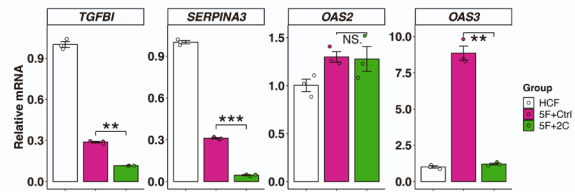

**Figure S12. TGFBI, SERPINA3, and OAS3 are significantly down-regulated in 2C-treated hiCMs.**

## Supplemental figures legend

### 1. Figure S1. Dosage and timing optimization for 2C, related to Figure 1

(A-B) Representative immunocytochemistry images (A) and quantification (B) of cTnT+ cells 2 weeks after transduction with GMT and supplemented with C1 at different concentration. C2 was supplemented at a concentration of 2  $\mu$ M. n = 4 independent experiments. Scale bars, 50  $\mu$ m.

(C-D) Representative immunocytochemistry images (C) and quantification (D) of cTnT+ cells 2 weeks after transduction with GMT and supplemented with C2 at different concentrations. C1 was supplemented at a concentration of 2  $\mu$ M. n = 4 independent experiments. Scale bars, 50  $\mu$ m.

(E) Quantification of the percentage of  $\alpha$ -actinin+ cells and the number of beating cells with different durations of 2C treatment. n = 4 independent experiments. All data are presented as the means  $\pm$  SEM. \*p < 0.05, \*\*p < 0.01, \*\*\*p < 0.001 versus the relevant control. NS., not significant.

### 2. Figure S2. MT+2C induced iCMs co-express multiple cardiomyocyte-specific markers, related to Figure 1

(A) MT+2C induced iCMs co-expressed cTnI and cTnT. Scale bars, 50  $\mu$ m.

(B) MT+2C induced iCMs co-expressed cTnI and  $\alpha$ -actinin. Scale bars, 50  $\mu$ m.

### 3. Figure S3 Confirmation of mouse cardiac fibroblasts, related to Figure 2

(A-B) Neonatal mouse cardiac fibroblasts and adult mouse cardiac fibroblasts were validated with cTnT (A) and  $\alpha$ -actinin (B) to exclude any contamination with cardiomyocytes.

### 4. Figure S4. Different combinations of transcription factors reveal MT enables cardiac reprogramming in presence of 2C, related to Figure 2

(A) Representative immunocytochemistry images of  $\alpha$ -actinin+ cells 3 weeks after transduction with different combinations of transcription factors, supplemented with 2C medium. Scale bars, 50  $\mu$ m.

(B) Quantification of  $\alpha$ -actinin+ cells 3 weeks after transduction with different combinations of transcription factors, supplemented with 2C medium. n = 5 independent experiments. All data are presented as the means  $\pm$  SEM. \*p < 0.05, \*\*p < 0.01, \*\*\*p < 0.001 versus the relevant control. NS., not significant.

### 5. Figure S5 Optimized stoichiometry of Mef2c and Tbx5 results in higher efficiency, related to Figure 2

(A) Schematic of bi-cistronic constructs with different 2A sequences.

(B) Relative expression of Gata4, Mef2c, and Tbx5 in different bi-cistronic constructs, determined by qPCR. n = 3 independent experiments.

(C) Workflow of stoichiometry optimization of Mef2c and Tbx5.

(D-E) Representative immunocytochemistry images (D) and quantification of  $\alpha$ -actinin+ cells and the number of spontaneous beating cells (E) 3 weeks after transduction with the indicated constructs in cardiac fibroblasts. n = 5 independent experiments. Scale bars, 50  $\mu$ m. All data are presented as the means  $\pm$  SEM. \*p < 0.05, \*\*p < 0.01, \*\*\*p < 0.001 versus the relevant control. NS., not significant.

### 6. Figure S6 MT+2C selectively reprogram fibroblasts derived from heart into iCMs, related to Figure 2

Representative immunocytochemistry images and quantification of cTnT+ cells 3 weeks post transduction with MT (M-T2A-T) or MGT (M-P2A-G-T2A-T), in combinations with Ctrl or 2C treatment of various fibroblasts derived from indicated organs/tissues. n = 5 independent experiments. Scale bars, 50  $\mu$ m. MICF, adult mouse cardiac fibroblasts isolated from mice treated with myocardial infarction. MEF, mouse embryonic fibroblasts.

### 7. Figure S7. Both C1 and C2 are essential for substituting Gata4, related to Figure 2

(A-C) Representative immunocytochemistry images (A), quantification of cTnT+ cells (B) and quantification of the number of spontaneous beating cells (C) 3 weeks after transduction with MT, in combination with Ctrl (DMSO), C1, C2, 2C, SB+XAV (SB43542+XAV939), or 2C+XAV (SB431542+Baricitinib+XAV939). Scale bars, 50  $\mu$ m. n = 4 independent experiments. All data are

presented as the means  $\pm$  SEM. \* $p < 0.05$ , \*\* $p < 0.01$ , \*\*\* $p < 0.001$  versus the relevant control. NS., not significant.

**8. Figure S8. 2C enhances cardiac reprogramming progressively, related to Figure 3**

(A) Volcano map of differentially expressed genes (DEGs) between MT+2C and MT+Ctrl treatment of cardiac fibroblasts on d2, d6, d10, and 5 weeks after induction.  $n = 2-3$  independent experiments.

(B) Venn diagram of down-regulated genes and up-regulated genes in (A).

(C) Relative expression of cardiomyocyte (CM) related genes in cultured cells with MT+Ctrl and MT+2C treatment d2, d6, d10, and 5 weeks after induction.  $n = 2-3$  independent experiments.

(D) Relative expression of a set of cardiac fibroblast (CF) related genes in cultured cells with MT+Ctrl and MT+2C treatment d2, d6, d10, and 5 weeks after induction.  $n = 2-3$  independent experiments.

(E) Principal component analysis (PCA) of DEGs between 2C and control (Ctrl) treatment of MT-transduced cardiac fibroblasts on d2, d6, d10, and 5 weeks after induction.  $n = 2-3$  independent experiments.

**9. Figure S9. Confirmation of human cardiac fibroblasts, related to Figure 4**

Human cardiac fibroblasts (HCF) were confirmed by the expression of Periostin and without expression of  $\alpha$ -actinin, cTnT or cMHC. Scale bars, 100  $\mu\text{m}$ .

**10. Figure S10. All TGF beta inhibitors tested works as C1, whereas only a few pan-Jak inhibitors work as C2, related to Figure 7**

(A) Quantification for cTnT+ cells 3 weeks after transduction with MT, in combination with C2 and indicated TGF beta inhibitors at different concentrations.  $n = 3$  independent experiments.

(B) Quantification for cTnT+ cells 3 weeks after transduction with MT, in combination with C1 and indicated Jak inhibitors.  $n = 3$  independent experiments.

(C) Quantification of the number of spontaneous beating cells 3 weeks after transduction with MT, in combination with C1 and indicated Jak inhibitors.  $n = 3$  independent experiments.

**11. Figure S11. C2 enhances cardiac reprogramming independent of inhibiting the canonical Jak-Stat signal pathway, related to Figure 7**

(A-B) Representative immunocytochemistry images (A) and quantification of  $\alpha$ -actinin+ cells (B) 3 weeks after transduction with MT, supplemented with C1 treatment.  $n = 4$  independent experiments. Scale bars, 50  $\mu\text{m}$ .

(C-D) Representative immunocytochemistry images (C) and quantification of cTnT+ cells (D) 3 weeks after transduction with MT, supplemented with C1 treatment.  $n = 3$  independent experiments. Scale bars, 50  $\mu\text{m}$ .

(E) Quantification of the number of spontaneous beating cells 3 weeks after transduction with MT, supplemented with C1 treatment.  $n = 4$  independent experiments.

(F-H) Representative immunocytochemistry images (F), quantification of cTnT+ cells (G) and spontaneous beating cells (H) 3 weeks after transduction with MT, supplemented with C1 treatment and C2 at indicated concentrations.  $n = 4$  independent experiments. Scale bars, 50  $\mu\text{m}$ .

(I) Quantification of the percentage of  $\alpha$ -actinin+ cells and the number of spontaneous beating cells 3 weeks after transduction with MT and indicated EGFP or Stat3 mutants, cultured in C1 or 2C medium as indicated in the figure. P and dP represent mutants at indicated amino acids to simulate the phosphorylated and dephosphorylated states of Stat3.  $n = 4$  independent experiments. All data are presented as the means  $\pm$  SEM. \* $p < 0.05$ , \*\* $p < 0.01$ , \*\*\* $p < 0.001$  versus the relevant control. NS., not significant.

**12. Figure S12. TGFBI, SERPINA3, and OAS3 are significantly down-regulated in 2C-treated hiCMs, related to Figure 7**

Relative expression of TGFBI, SERPINA3, OAS2, and OAS3 in human cardiac fibroblasts control and human cardiac fibroblasts treated with 5F or 5F+2C, determined by qPCR.  $n = 3$  independent experiments.

## Supplemental table legend

1. Table S1. List of primers, related to STAR Methods.



| <b>Table S1. List of Primers for qPCR</b> |                  |                         |                         |
|-------------------------------------------|------------------|-------------------------|-------------------------|
| <b>Species</b>                            | <b>Gene Name</b> | <b>Forward Primer</b>   | <b>Reverse Primer</b>   |
| <i>M. musculus</i>                        | <i>Gapdh</i>     | AGGTCGGTGTGAACGGATTTG   | TGTAGACCATGTAGTTGAGGTCA |
| <i>M. musculus</i>                        | <i>Myh6</i>      | GCCCAGTACCTCCGAAAGTC    | GCCTTAACATACTCCTCCTTGTC |
| <i>M. musculus</i>                        | <i>Tnnt2</i>     | CAGAGGAGGCCAACGTAGAAG   | CTCCATCGGGGATCTTGGGT    |
| <i>M. musculus</i>                        | <i>Actc1</i>     | CTGGATTCTGGCGATGGTGTGA  | CGGACAATTTACGTTTCAGCA   |
| <i>M. musculus</i>                        | <i>Ryr2</i>      | ATGGCTTTAAGGCACAGCG     | CAGAGCCCGAATCATCCAGC    |
| <i>M. musculus</i>                        | <i>Nppa</i>      | GCTTCCAGGCCATATTGGAG    | GGGGGCATGACCTCATCTT     |
| <i>M. musculus</i>                        | <i>Gja1</i>      | ACAGCGGTTGAGTCAGCTTG    | GAGAGATGGGGAAGGACTTGT   |
| <i>M. musculus</i>                        | <i>Gata4</i>     | CCCTACCCAGCCTACATGG     | ACATATCGAGATTGGGGTGTCT  |
| <i>M. musculus</i>                        | <i>Mef2c</i>     | ATGCCATCAGTGAATCAAAGGAT | GTGGTACGGTCTCCCAACT     |
| <i>M. musculus</i>                        | <i>Tbx5</i>      | ATGGCCGATACAGATGAGGG    | TTCGTGGAAC TTCAGCCACAG  |
| <i>H. sapiens</i>                         | <i>GAPDH</i>     | GGAGCGAGATCCCTCCAAAAT   | GGCTGTTGTCATACTTCTCATGG |
| <i>H. sapiens</i>                         | <i>MYH6</i>      | GCCCTTTGACATTGCACTG     | GGTTTCAGCAATGACCTTGCC   |
| <i>H. sapiens</i>                         | <i>ACTN2</i>     | CAAACCTGACCGGGGAAAAAT   | CTGAATAGCAAAGCGAAGGATGA |
| <i>H. sapiens</i>                         | <i>TNNT2</i>     | GGAGGAGTCCAAACCAAAGCC   | TCAAAGTCCACTCTCTCTCCATC |
| <i>H. sapiens</i>                         | <i>ACTC1</i>     | TCCCATCGAGCATGGTATCAT   | GGTACGGCCAGAAGCATACA    |
| <i>H. sapiens</i>                         | <i>COL1A1</i>    | GAGGGCCAAGACGAAGACATC   | CAGATCACGTCATCGCACAAAC  |
